# Supplementary material
Source: PubMed Central journal article supplement (PMC4742381)

**Supplemental Table 1: Summary Scales of the NICU Network Neurobehavioral Scale (NNNS)**

| Summary Scale Name                             | Description                                                                                                                                                                                                                                                                                                                                                                                                              | Scoring Range |
|------------------------------------------------|--------------------------------------------------------------------------------------------------------------------------------------------------------------------------------------------------------------------------------------------------------------------------------------------------------------------------------------------------------------------------------------------------------------------------|---------------|
| Habituation                                    | Habituation is a measure of the infants response to repeated presentations of a rattle and a bell (auditory) as well as a light (visual) stimulus while asleep; high scores indicate faster rates of habituation to stimuli while maintaining a sleep state.                                                                                                                                                             | 1-9           |
| Attention (Orientation)                        | Attention is a measure of the infant's ability to localize and track auditory (examiner voice, rattle sound) and visual (examiner face, rattle, ball) stimuli while in a sustained quiet alert state; high scores indicate appropriate and sustained alertness to stimuli.                                                                                                                                               | 1-9           |
| Handling                                       | Mean number of maneuvers needed to keep the infant alert and calm during orientation; scores closer to 1 indicate more help from the examiner was needed to maintain a quiet alert state during orientation.                                                                                                                                                                                                             | 0-1           |
| Quality Movement                               | Quality of Movements is a measure of the infant's motor quality including smoothness, maturity, modulation of movement of the arms and legs as well as startles and tremors; high scores indicate good motor control                                                                                                                                                                                                     | 1-9           |
| Self Regulation                                | Self-regulation is a measure of the infant's responses in motor activity, physiology, and state in response to the demands of the NNNS exam and examiners attempt to console when crying; higher scores indicate better regulation.                                                                                                                                                                                      | 1-9           |
| Non-Optimal Reflexes                           | Non-Optimal reflexes represents the total number of non-optimal reflex responses elicited                                                                                                                                                                                                                                                                                                                                | 0-15          |
| Stress/Abstinence Signs                        | Stress-Abstinence Signs represents that mean number of stress/abstinence signs displayed by the infant across five organ systems (autonomic, physiologic, gastrointestinal, skin, and central-nervous system); a score closer to 1 indicates a high number of observed stress/abstinence signs.                                                                                                                          | 0-1           |
| Central Nervous System Stress-Abstinence Signs | CNS Stress-Abstinence Signs represents the mean number of central nervous system related stress/abstinence signs displayed by the infant, including startles, tremors, backarching, and abnormal posturing; a score closer to 1 indicates a high number of observed CNS stress/abstinence signs. This summary score was used separately due to the high degree of applicability of potential effects of SRI medications. | 0-1           |
| Arousal                                        | This is the level of arousal and associated motor activity during the NNNS exam; high scores indicate high arousal, activity, and fussing and crying during the exam.                                                                                                                                                                                                                                                    | 1-9           |
| Hypertonia                                     | Hypertonia is the mean number of items in which the infant's response was characterized by high muscle tone (rigidity or lack of relaxation at rest) in the arms, legs, and/or trunk.                                                                                                                                                                                                                                    | 0-10          |
| Hypotonia                                      | Hypotonia is the mean number of items in which the infant's response was characterized by decreased muscle tone (limp, flaccid, or weak) in the arms, legs, and/or trunk.                                                                                                                                                                                                                                                | 0-10          |
| Asymmetrical Reflexes                          | This is the total number of asymmetric responses to elicited reflexes                                                                                                                                                                                                                                                                                                                                                    | 0-16          |
| Excitability                                   | Excitability is a measure of high levels of motor, state and physiological reactivity; high scores reflect infant irritability and high reactivity to stimuli and handling.                                                                                                                                                                                                                                              | 0-15          |
| Lethargy                                       | Lethargy is a measure of low levels of motor, state and physiological reactivity; high scores reflect an infant who is sleepy and/or has low reactivity to stimuli and handling.                                                                                                                                                                                                                                         | 0-15          |

**Supplemental Table 2. Model-Estimated Means and Standard Errors of Significant NNNS Subscale Scores Over the First Month by Early vs Late SRI Exposure Group (N=63)**

| Variable            | LATE SRI EXP |             | EARLY SRI EXP |             | GROUP       |             | GROUP * DAYS |      |
|---------------------|--------------|-------------|---------------|-------------|-------------|-------------|--------------|------|
|                     | DF           | M (SE)      | DF            | M (SE)      | F           | p<          | F            | p<   |
| Arousal             | 81           | 4.05 (0.08) | 75            | 4.13 (0.18) | 0.16        | 0.69        | 2.34         | 0.06 |
| Attention           | 72           | 4.61 (0.11) | 77            | 5.18 (0.23) | <b>5.30</b> | <b>0.02</b> | 0.24         | 0.92 |
| CNS Stress          | 75           | 0.23 (0.01) | 79            | 0.22 (0.03) | 0.06        | 0.81        | 0.40         | 0.81 |
| Habituation         | 17           | 6.96 (0.27) | 135           | 7.05 (0.67) | 0.02        | 0.89        | 1.09         | 0.48 |
| Handling            | 79           | 0.37 (0.03) | 83            | 0.35 (0.06) | 0.15        | 0.70        | 1.33         | 0.26 |
| Hypotonicity        | 129          | 0.54 (0.06) | 103           | 0.33 (0.13) | 2.20        | 0.14        | 0.55         | 0.70 |
| Quality of Movement | 53           | 4.01 (0.06) | 59            | 4.10 (0.13) | 0.38        | 0.54        | 0.18         | 0.95 |
| Self Regulation     | 90           | 5.25 (0.10) | 108           | 5.38 (0.22) | 0.27        | 0.60        | 1.55         | 0.19 |

**Supplemental Figure. NNNS scores over days from birth for infants with exposure to SRIs Early (last reported dose before Week 35) versus Late (through delivery) in gestation.**

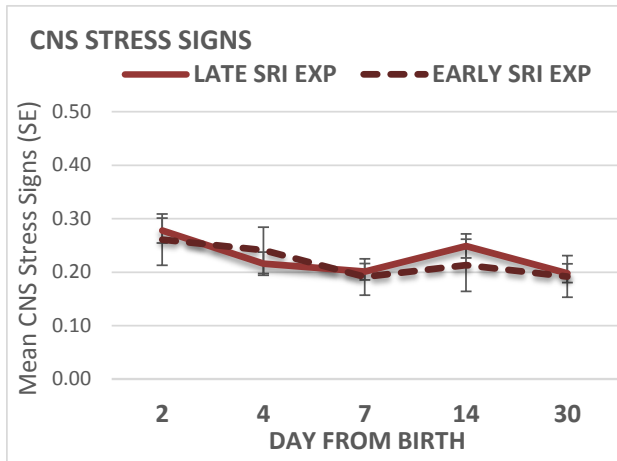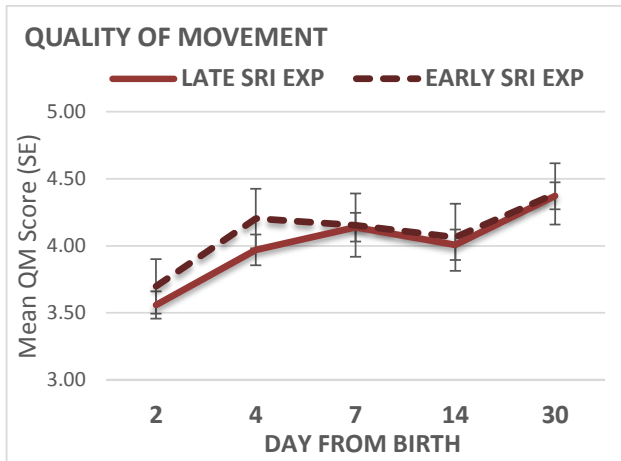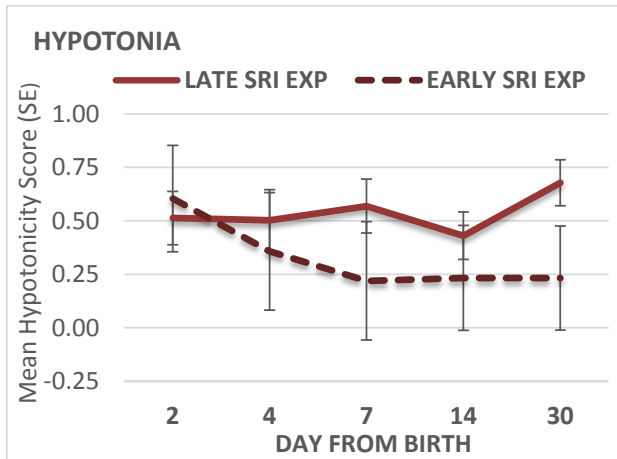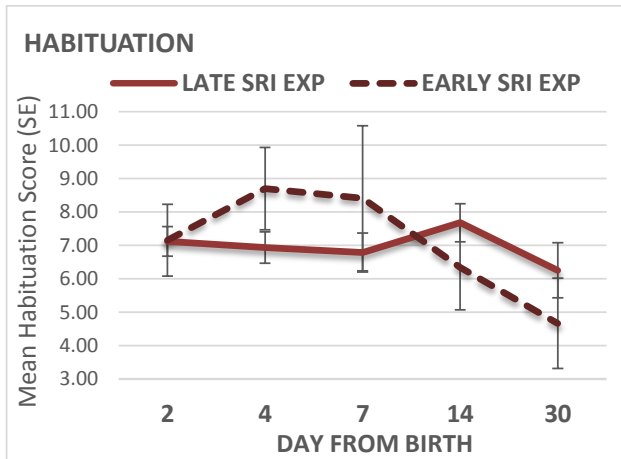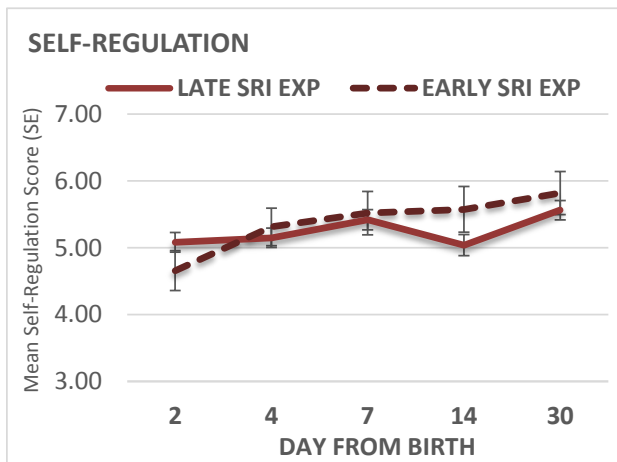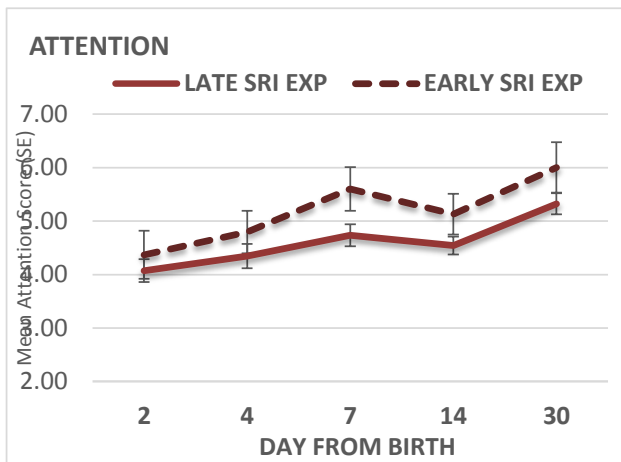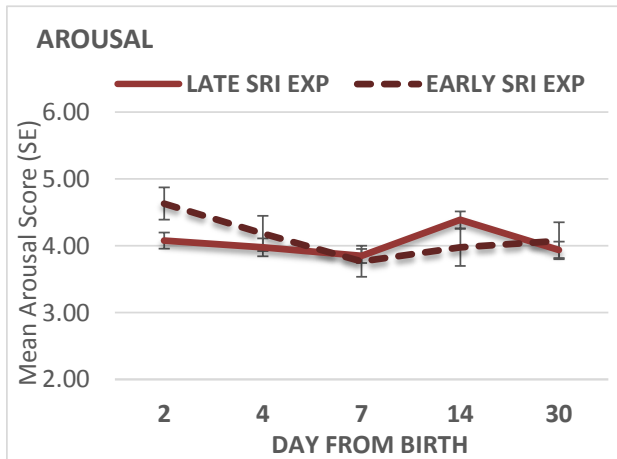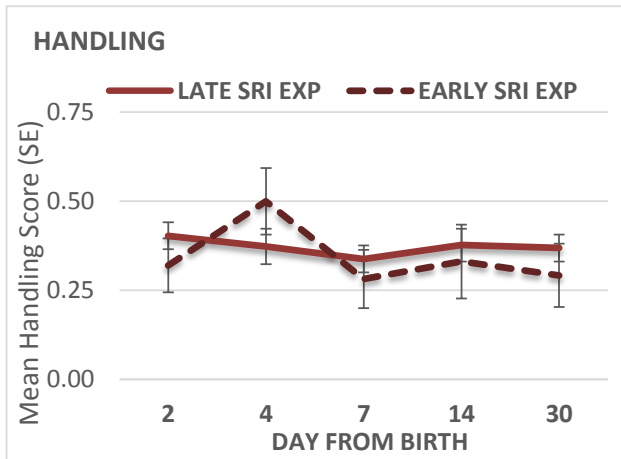

Supplement: NIHMS742095-supplement-2.pdf [file NIHMS742095-supplement-2.pdf]
